# Supplementary material for: Patient safety culture in China: a case study in an outpatient setting in Beijing
Source: PubMed Central journal article supplement — BMJ Qual Saf. 2013 Dec 18;23(7):556–64. doi: 10.1136/bmjqs-2013-002172 (PMC4079961; doi:10.1136/bmjqs-2013-002172), 2013-12-18
Supplement: bmjqs-2013-002172-s1.pdf [file bmjqs-2013-002172-s1.pdf]

## Additional materials not included in the article

### Appendix 1: Doctors allocated to different service arenas (%)

| Characteristics                        | Second Outpatient<br>Department | First Outpatient<br>Department |
|----------------------------------------|---------------------------------|--------------------------------|
| Qualification                          |                                 |                                |
| Master degree or higher                | 43.1%                           | 41.2%                          |
| Bachelor degree                        | 56.9%                           | 58.8%                          |
| Specialty                              |                                 |                                |
| General Internal Medicine              | 33.3%                           | 35.3%                          |
| Surgery                                | 13.9%                           | 11.8%                          |
| Gynecology                             | 11.1%                           | 5.9%                           |
| Pediatrics                             | 8.3%                            | 11.8%                          |
| Traditional Chinese Medicine           | 8.3%                            | 11.8%                          |
| Others (Dental, Dermatology, Eye, ENT) | 25.0%                           | 23.5%                          |

### Appendix 2: Nurses allocated to different service arenas (%)

| Characteristics                 | Second Outpatient<br>Department | First Outpatient<br>Department |
|---------------------------------|---------------------------------|--------------------------------|
| Qualification                   |                                 |                                |
| Bachelor degree                 | 8.3%                            | 7.7%                           |
| Associate degree                | 38.3%                           | 42.3%                          |
| Vocational certificate          | 53.3%                           | 50.0%                          |
| Professional title              |                                 |                                |
| Chief nurse                     | 15.0%                           | 11.5%                          |
| Registered nurse                | 25.0%                           | 26.9%                          |
| License nurse                   | 60.0%                           | 61.5%                          |
| Duties                          |                                 |                                |
| Triage and assist in treatment  | 75.0%                           | 73.1%                          |
| Injection and intravenous drips | 25.0%                           | 26.9%                          |

### Appendix 3: Demographic characteristics of respondents (n=318)

| Characteristics                     |                                 | Count | N %   |
|-------------------------------------|---------------------------------|-------|-------|
| Age (years)                         | <35                             | 172   | 54.1% |
|                                     | 35-                             | 92    | 28.9% |
|                                     | 45-                             | 49    | 15.4% |
|                                     | Missing                         | 5     | 1.6%  |
| Sex                                 | Male                            | 75    | 23.6% |
|                                     | Female                          | 218   | 68.6% |
|                                     | Missing                         | 25    | 7.9%  |
| Sub-profession                      | Doctor                          | 125   | 39.3% |
|                                     | Nurse                           | 88    | 27.7% |
|                                     | Other health worker             | 51    | 16.0% |
|                                     | Administration/management       | 50    | 15.7% |
|                                     | Missing                         | 4     | 1.3%  |
| Direct contact with patient         | Yes                             | 290   | 91.2% |
|                                     | No                              | 13    | 4.1%  |
|                                     | Missing                         | 15    | 4.7%  |
| Qualification                       | Up to high school or equivalent | 29    | 9.1%  |
|                                     | Associate degree                | 101   | 31.8% |
|                                     | Tertiary degree                 | 181   | 56.9% |
|                                     | Missing                         | 7     | 2.2%  |
| Years of working in the hospital    | Up to 5                         | 129   | 40.6% |
|                                     | 6-10                            | 81    | 25.5% |
|                                     | 11-                             | 106   | 33.3% |
|                                     | Missing                         | 2     | 0.6%  |
| Years of working in current unit    | Up to 5                         | 161   | 50.6% |
|                                     | 6-10                            | 83    | 26.1% |
|                                     | 11-                             | 71    | 22.3% |
|                                     | Missing                         | 3     | 1.0%  |
| Average weekly workload (hours)     | Up to 39                        | 26    | 8.2%  |
|                                     | 40-59                           | 220   | 69.2% |
|                                     | 60-                             | 58    | 18.2% |
|                                     | Missing                         | 14    | 4.4%  |
| Years of working in health industry | Up to 5                         | 86    | 27.1% |
|                                     | 6-10                            | 85    | 26.7% |
|                                     | 11-                             | 132   | 41.5% |
|                                     | Missing                         | 15    | 4.7%  |

#### **Appendix 4: Interview guidelines for health workers**

1. How do you think about the safety of patients in your unit?
  - a. If you think you are doing well, why and how do you know?
  - b. If you don't think you are doing well, why and how do you know?
2. What are the major errors causing safety problems in your unit?
  - a. Who are responsible for the errors?
  - b. Do you think the errors preventable? If yes, why and how? If not, why?
3. What measures have you taken to ensure the safety of patients? Could you please give examples?
  - a. Policy?
  - b. Reporting?
  - c. Learning?
  - d. Administration?
  - e. Others?
4. How are these measures working?
  - a. Role of managers?
  - b. Role of care providers?
  - c. Role of patients?
5. Could you please tell us how you personally involved in patient safety management?
  - a. When you make mistakes, do you report? Why?
  - b. How do you respond when you find others doing things wrong?
  - c. How do you discuss with patients about adverse events?
6. What are your concerns about the patient safety measures in your unit?
7. If a patient raised questions about their care plan, how do you deal with it?
8. If a patient does not want to follow your instruction, what do you do?
9. What training do you think you need to improve the quality of care and safety of patients?
10. How can your organisation do better in patient safety?

#### **Appendix 5: Interview guidelines for patients**

1. What services did you get from your recent visit to the outpatient department?
  - a. For what reasons?
  - b. Are you happy with the services? Why?
  - c. Did you get any other services from other health organisations for the same health problems? When and Why?
2. Why do you choose this particular clinic?
  - a. What do you think about the quality of services provided by the clinic?
  - b. How do you know?
  - c. Who referred you?
3. Medical services sometimes do harm to patients, but it is not necessarily an error from medical providers. Did you have any concerns about your safety when you visited the clinic?
  - a. What are your concerns?
  - b. How do you know?
  - c. What have you done to make sure you are safe?
  - d. What do you think you can do better to ensure your safety?
  - e. What do you think the clinic can do (or do better) to ensure your safety?
4. How did your doctor or nurse discuss with you about the potential adverse impact of your services?
  - a. Have you noticed that before?
  - b. Did you understand?
  - c. How did you make the final decisions?
5. Have you experienced or noticed any safety problems in your recent visit to the clinic?
  - a. Who do you think should be responsible for the problems?
  - b. Do you think the problems preventable? If yes, why and how? If not, why?
  - c. How did the clinic respond to the problems?
  - d. Are you happy with way the clinic handle these problems? Why?
6. What measures are you most impressed in relation to patient safety?
  - a. What was it?
  - b. Who did it? How?
  - c. Why are you impressed?
7. Have you been consulted about how to improve services?
  - a. What advices have you provided?
  - b. Do you think they are considered by the clinic?
8. How do you think the clinic can do better in patient safety?

**Appendix 6: Characteristics of interview participants**

| Characteristics | Number of participants |                         |         |    |
|-----------------|------------------------|-------------------------|---------|----|
|                 | Patient                | Frontline health worker | Manager |    |
| Age             | <40                    | 10                      | 12      | 4  |
|                 | ≥40                    | 12                      | 3       | 8  |
| Sex             | Men                    | 8                       | 5       | 4  |
|                 | Women                  | 14                      | 10      | 8  |
| Area of service | Internal               | 8                       | -       | -  |
|                 | Surgery                | 2                       | -       | -  |
|                 | Gynaecology/Obstetrics | 1                       | -       | -  |
|                 | Paediatrics            | 2 (parents)             | -       | -  |
|                 | Others                 | 9                       | -       | -  |
| Profession      | Doctor                 | -                       | 6       | -  |
|                 | Nurse                  | -                       | 4       | -  |
|                 | Other health worker    | -                       | 5       | -  |
|                 | Clinical manager       | -                       | -       | 9  |
|                 | Hospital manager       | -                       | -       | 3  |
| Work experience | <5 years               | -                       | 2       | 0  |
|                 | 5-9 years              | -                       | 2       | 1  |
|                 | ≥10 years              | -                       | 11      | 11 |

**Appendix 7: Factors associated with patient safety culture: results from multivariate stepwise regression analysis (standardised  $\beta$  coefficients with statistical significance,  $p < 0.05$ )\***

|                                             | Frequency of Events Reporting (n=247) | Overall Perceptions of Patient Safety (n=244) | Manager Expectations and Actions Promoting Patient Safety (n=249) | Organisational Learning (n=246) | Teamwork Within Units (n=248) | Communication Openness (n=248) | Feedback and Communication About Error (n=243) | Staffing (n=247) | Non-punitive Response to Error (n=245) | Management Support for Patient Safety (n=243) | Teamwork Across Units to Patient Safety (n=247) | Handoffs and Transitions (n=247) |
|---------------------------------------------|---------------------------------------|-----------------------------------------------|-------------------------------------------------------------------|---------------------------------|-------------------------------|--------------------------------|------------------------------------------------|------------------|----------------------------------------|-----------------------------------------------|-------------------------------------------------|----------------------------------|
| Number of events personally reported        | 0.180                                 |                                               |                                                                   |                                 |                               |                                | 0.131                                          |                  | 0.118                                  |                                               |                                                 |                                  |
| Personal rating on patient safety of units  |                                       | 0.398                                         | 0.316                                                             | 0.193                           | 0.155                         | 0.309                          | 0.342                                          | 0.354            | 0.153                                  | 0.494                                         | 0.304                                           | 0.344                            |
| Weekly workload                             |                                       |                                               |                                                                   |                                 |                               |                                |                                                |                  |                                        |                                               |                                                 |                                  |
| <40                                         |                                       |                                               | 0.154                                                             | 0.246                           |                               |                                |                                                |                  |                                        |                                               |                                                 |                                  |
| 40-59                                       |                                       |                                               | 0.302                                                             | 0.174                           |                               |                                |                                                |                  |                                        |                                               | 0.154                                           | 0.200                            |
| (Reference) 60 or more                      |                                       |                                               |                                                                   |                                 |                               |                                |                                                |                  |                                        |                                               |                                                 |                                  |
| Profession                                  |                                       |                                               |                                                                   |                                 |                               |                                |                                                |                  |                                        |                                               |                                                 |                                  |
| Nurse                                       |                                       |                                               | 0.118                                                             |                                 |                               |                                | 0.120                                          |                  |                                        |                                               |                                                 |                                  |
| Doctor                                      |                                       |                                               |                                                                   |                                 |                               |                                |                                                |                  | -0.134                                 |                                               |                                                 |                                  |
| Other health worker                         |                                       |                                               |                                                                   |                                 |                               |                                |                                                |                  |                                        |                                               |                                                 | -0.169                           |
| (reference) Administration/management       |                                       |                                               |                                                                   |                                 |                               |                                |                                                |                  |                                        |                                               |                                                 |                                  |
| Age                                         |                                       |                                               |                                                                   |                                 |                               |                                |                                                |                  |                                        |                                               |                                                 |                                  |
| <35                                         |                                       |                                               |                                                                   |                                 |                               |                                |                                                |                  |                                        |                                               |                                                 | -0.140                           |
| 35-44                                       |                                       |                                               |                                                                   |                                 |                               |                                |                                                |                  |                                        |                                               |                                                 |                                  |
| (Reference) 45-                             |                                       |                                               |                                                                   |                                 |                               |                                |                                                |                  |                                        |                                               |                                                 |                                  |
| Qualification                               |                                       |                                               |                                                                   |                                 |                               |                                |                                                |                  |                                        |                                               |                                                 |                                  |
| Tertiary degree                             |                                       |                                               |                                                                   |                                 |                               |                                |                                                |                  |                                        |                                               |                                                 |                                  |
| Tertiary certificate/diploma                | 0.132                                 |                                               |                                                                   |                                 |                               |                                |                                                |                  |                                        |                                               |                                                 |                                  |
| (reference) No tertiary certificate/diploma |                                       |                                               |                                                                   |                                 |                               |                                |                                                |                  |                                        |                                               |                                                 |                                  |
| Setting                                     |                                       |                                               |                                                                   |                                 |                               |                                |                                                |                  |                                        |                                               |                                                 |                                  |
| Clinic Two                                  |                                       |                                               |                                                                   |                                 |                               | -0.123                         |                                                | 0.182            | 0.160                                  | 0.238                                         | 0.268                                           | 0.206                            |
| (reference) Clinic One                      |                                       |                                               |                                                                   |                                 |                               |                                |                                                |                  |                                        |                                               |                                                 |                                  |

\*: A standardised  $\beta$  coefficient indicates the increase or decrease (-) effect on a mean dimensional score associated with a particular characteristic of the respondents (measured by the independent variables).

**Appendix 8: Individual preference on reporting errors, number (percentage)**

| <b>Statement</b>                                                                               | <b>Disagree</b> | <b>Neutral</b> | <b>Agree</b> | <b>Total</b> |
|------------------------------------------------------------------------------------------------|-----------------|----------------|--------------|--------------|
| <b>I would disclose errors committed by myself</b>                                             | 23 (7.6%)       | 68 (22.5%)     | 211 (69.9%)  | 302 (100.0%) |
| <b>Sometimes I did not disclose my errors because of fear of</b>                               |                 |                |              |              |
| Being looked down on by others                                                                 | 71 (45.2%)      | 49 (31.2%)     | 37 (23.6%)   | 157 (100.0%) |
| Being criticised by superior                                                                   | 46 (27.7%)      | 54 (32.5%)     | 66 (39.8%)   | 166 (100.0%) |
| Being punished such as financial penalty                                                       | 60 (22.1%)      | 80 (29.4%)     | 132 (48.5%)  | 272 (100.0%) |
| <b>I would disclose errors committed by my colleagues</b>                                      | 63 (36.4%)      | 52 (30.1%)     | 58 (33.5%)   | 173 (100.0%) |
| <b>Sometimes I did not disclose colleague errors because</b>                                   |                 |                |              |              |
| I had no obligation to do so                                                                   | 50 (29.8%)      | 55 (32.7%)     | 63 (37.5%)   | 168 (100.0%) |
| My colleagues might notice who reported                                                        | 40 (23.1%)      | 51 (29.5%)     | 82 (47.4%)   | 173 (100.0%) |
| I did not want to be seen as a whistle blower                                                  | 35 (18.8%)      | 46 (24.7%)     | 105 (56.5%)  | 186 (100.0%) |
| <b>I would disclose management errors</b>                                                      | 40 (14.4%)      | 84 (30.3%)     | 153 (55.2%)  | 277 (100.0%) |
| <b>Sometimes I did not disclose management errors because</b>                                  |                 |                |              |              |
| I had no obligation to do so                                                                   | 42 (25.3%)      | 70 (42.2%)     | 54 (32.5%)   | 166 (100.0%) |
| Manager might be offended                                                                      | 37 (22.3%)      | 65 (39.2%)     | 64 (38.6%)   | 166 (100.0%) |
| This attracted no solution                                                                     | 42 (2.1%)       | 55 (28.9%)     | 93 (48.9%)   | 190 (100.0%) |
| <b>I would disclose my errors if no penalty is attached</b>                                    | 43 (15.0%)      | 92 (32.2%)     | 151 (52.8%)  | 286 (100.0%) |
| <b>Sometimes I did not disclose my errors because I had no confidence in no penalty policy</b> | 31 (18.3%)      | 73 (43.2%)     | 65 (38.5%)   | 169 (100.0%) |
| <b>I would be willing to use an anonymous reporting system</b>                                 | 48 (15.9%)      | 64 (21.2%)     | 190 (62.9%)  | 302 (100.0%) |

**Appendix 9: Comparison of average positive scores of HSOPC subscales across different weekly workloads**

|                                                                                         | Less than 40 hours (1) |      | 40-59 hours (2) |      | 60 hours or more (3) |      | p value of ANOVA | Pairwise comparisons (LSD) p<0.05 |
|-----------------------------------------------------------------------------------------|------------------------|------|-----------------|------|----------------------|------|------------------|-----------------------------------|
|                                                                                         | Mean                   | SE   | Mean            | SE   | Mean                 | SE   |                  |                                   |
| Frequency of Events Reported                                                            | 0.40                   | 0.08 | 0.39            | 0.03 | 0.34                 | 0.06 | 0.687            |                                   |
| Overall Perceptions of Patient Safety                                                   | 0.44                   | 0.05 | 0.55            | 0.02 | <b>0.45</b>          | 0.04 | 0.015            | (3) vs (2)                        |
| Influence of Manager's (Supervisor's) Expectations and Actions Promoting Patient Safety | 0.68                   | 0.05 | 0.73            | 0.02 | <b>0.44</b>          | 0.05 | 0.000            | (3) vs (2)<br>(3) vs (1)          |
| Strength of Organisational Learning                                                     | 0.81                   | 0.05 | 0.74            | 0.02 | <b>0.57</b>          | 0.05 | 0.000            | (3) vs (2)<br>(3) vs (1)          |
| Quality of Teamwork Within Units                                                        | 0.90                   | 0.04 | 0.86            | 0.02 | <b>0.78</b>          | 0.03 | 0.039            | (3) vs (2)<br>(3) vs (1)          |
| Communication Openness                                                                  | 0.36                   | 0.06 | 0.31            | 0.02 | 0.28                 | 0.04 | 0.454            |                                   |
| Feedback and Communication About Error                                                  | 0.58                   | 0.06 | 0.64            | 0.02 | <b>0.49</b>          | 0.05 | 0.016            | (3) vs (2)                        |
| Non-punitive Response to Error                                                          | 0.28                   | 0.06 | 0.32            | 0.02 | <b>0.20</b>          | 0.03 | 0.037            | (3) vs (2)                        |
| Adequacy of Staffing to Support Good Patient Care                                       | 0.18                   | 0.05 | 0.24            | 0.02 | 0.17                 | 0.03 | 0.094            |                                   |
| Senior Management Support for Patient Safety                                            | 0.60                   | 0.06 | 0.58            | 0.02 | <b>0.35</b>          | 0.05 | 0.000            | (3) vs (2)<br>(3) vs (1)          |
| Contribution of Teamwork Across Units to Patient Safety                                 | 0.54                   | 0.07 | 0.63            | 0.02 | <b>0.38</b>          | 0.05 | 0.000            | (3) vs (2)                        |
| Safety of Handoffs and Transitions                                                      | 0.44                   | 0.07 | 0.55            | 0.02 | <b>0.27</b>          | 0.04 | 0.000            | (3) vs (2)<br>(3) vs (1)          |

**Bold:** The dimensional score with a significant difference with one or more others across different workload groups

### Appendix 10: Inter-correlations of the HSOPC subscales of patient safety culture

| Subscales                                                    | Mean<br>(95% CI)    | Pearson Correlation Coefficients |                         |                         |                         |                   |                         |                         |                         |                         |                         |                         |    |  |
|--------------------------------------------------------------|---------------------|----------------------------------|-------------------------|-------------------------|-------------------------|-------------------|-------------------------|-------------------------|-------------------------|-------------------------|-------------------------|-------------------------|----|--|
|                                                              |                     | 1                                | 2                       | 3                       | 4                       | 5                 | 6                       | 7                       | 8                       | 9                       | 10                      | 11                      | 12 |  |
| 1. Frequency of Events Reported                              | 0.38<br>(0.34-0.43) | 1                                |                         |                         |                         |                   |                         |                         |                         |                         |                         |                         |    |  |
| 2. Overall Perceptions of Patient Safety                     | 0.52<br>(0.49-0.55) | .08                              | 1                       |                         |                         |                   |                         |                         |                         |                         |                         |                         |    |  |
| 3. Manager Expectations and Actions Promoting Patient Safety | 0.66<br>(0.62-0.70) | .12 <sup>*</sup>                 | <b>.32<sup>**</sup></b> | 1                       |                         |                   |                         |                         |                         |                         |                         |                         |    |  |
| 4. Organisational Learning                                   | 0.71<br>(0.68-0.87) | .16 <sup>**</sup>                | .26 <sup>**</sup>       | <b>.31<sup>**</sup></b> | 1                       |                   |                         |                         |                         |                         |                         |                         |    |  |
| 5. Teamwork Within Units                                     | 0.85<br>(0.82-0.87) | .09                              | .13 <sup>*</sup>        | <b>.40<sup>**</sup></b> | <b>.37<sup>**</sup></b> | 1                 |                         |                         |                         |                         |                         |                         |    |  |
| 6. Communication Openness                                    | 0.31<br>(0.28-0.34) | .22 <sup>**</sup>                | .27 <sup>**</sup>       | <b>.35<sup>**</sup></b> | .18 <sup>**</sup>       | .20 <sup>**</sup> | 1                       |                         |                         |                         |                         |                         |    |  |
| 7. Feedback and Communication About Error                    | 0.61<br>(0.57-0.65) | <b>.34<sup>**</sup></b>          | .20 <sup>**</sup>       | <b>.44<sup>**</sup></b> | .28 <sup>**</sup>       | .29 <sup>**</sup> | <b>.46<sup>**</sup></b> | 1                       |                         |                         |                         |                         |    |  |
| 8. None-punitive Response to Error                           | 0.23<br>(0.20-0.25) | .05                              | .18 <sup>**</sup>       | .29 <sup>**</sup>       | .12 <sup>*</sup>        | .18 <sup>**</sup> | .15 <sup>**</sup>       | .15 <sup>**</sup>       | 1                       |                         |                         |                         |    |  |
| 9. Staffing                                                  | 0.29<br>(0.26-0.33) | .07                              | <b>.37<sup>**</sup></b> | <b>.34<sup>**</sup></b> | .25 <sup>**</sup>       | .21 <sup>**</sup> | .20 <sup>**</sup>       | <b>.30<sup>**</sup></b> | <b>.33<sup>**</sup></b> | 1                       |                         |                         |    |  |
| 10. Management Support for Patient Safety                    | 0.53<br>(0.49-0.57) | .17 <sup>**</sup>                | <b>.36<sup>**</sup></b> | <b>.49<sup>**</sup></b> | <b>.35<sup>**</sup></b> | .27 <sup>**</sup> | <b>.36<sup>**</sup></b> | <b>.34<sup>**</sup></b> | .19 <sup>**</sup>       | <b>.45<sup>**</sup></b> | 1                       |                         |    |  |
| 11. Teamwork Across Units                                    | 0.57<br>(0.53-0.61) | -.01                             | .28 <sup>**</sup>       | <b>.47<sup>**</sup></b> | .29 <sup>**</sup>       | .24 <sup>**</sup> | .24 <sup>**</sup>       | <b>.32<sup>**</sup></b> | .24 <sup>**</sup>       | <b>.36<sup>**</sup></b> | <b>.56<sup>**</sup></b> | 1                       |    |  |
| 12. Handoffs and Transitions                                 | 0.48<br>(0.44-0.52) | -.01                             | <b>.32<sup>**</sup></b> | <b>.42<sup>**</sup></b> | .16 <sup>**</sup>       | .10               | .20 <sup>**</sup>       | .26 <sup>**</sup>       | .18 <sup>**</sup>       | <b>.33<sup>**</sup></b> | <b>.48<sup>**</sup></b> | <b>.57<sup>**</sup></b> | 1  |  |

\*: Correlation is significant at the 0.05 level (2-tailed).

\*\* : Correlation is significant at the 0.01 level (2-tailed).

95% CI: 95% Confidence Interval

**Bold:** Medium correlations with a coefficient greater than 0.3. As is indicated in shadowed cells, most of them fall into Subscales 3 and 10.
